# Supplementary material
Source: PubMed Central journal article supplement (PMC7380200)
Supplement: supp_RA120.014064_160418_2_supp_537695_qb02kh.pdf [file supp_RA120.014064_160418_2_supp_537695_qb02kh.pdf]

## SUPPORTING INFORMATION

### A requirement for an active proton delivery network supports a Compound I mediated C-C bond cleavage mechanism in CYP51 catalysis

Tatiana Y. Hargrove<sup>1</sup>, Zdzislaw Wawrzak<sup>2</sup>, F. Peter Guengerich<sup>1</sup>, and Galina I. Lepesheva<sup>1,3,\*</sup>

#### Table of Contents

|                                                                                                         |    |
|---------------------------------------------------------------------------------------------------------|----|
| Figure S1. Examples of cytochromes P450 catalyzing multistep reactions                                  | S2 |
| Figure S2. The asymmetric unit of 6UEZ                                                                  | S3 |
| Figure S3. Movement of the helix C and HI arm reshape the proximal surface of the CYP51 molecule        | S4 |
| Figure S4. Solvent molecules near the proton delivery area in D231A/H314A human CYP51                   | S5 |
| Figure S5. The HPLC profile of a sterol mixture containing the 14 $\alpha$ -carboxaldehyde intermediate | S6 |
| Figure S6. HPLC profiles of the aldehyde deformylation by WT and D231A/H314A human CYP51                | S7 |
| Table S1. Substrate-contacting residues ( $\leq 4.5$ Å) in human and <i>T. cruzi</i> CYP51              | S8 |

CYP11A1 (P450<sub>scc</sub>)

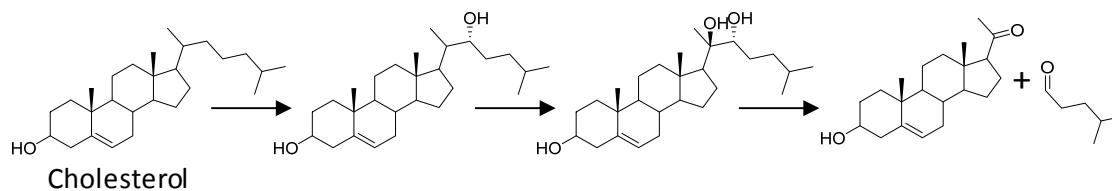

CYP17A1

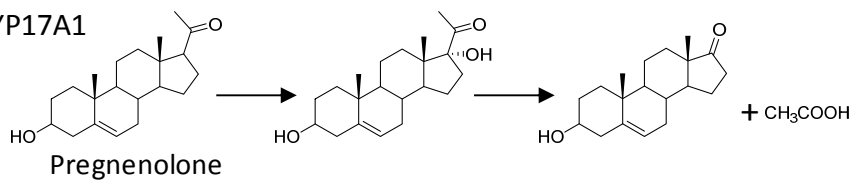

CYP19A1 (aromatase)

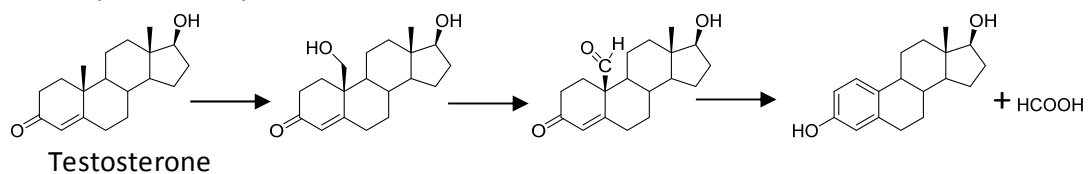

**Figure S1.** Examples of some other cytochromes P450 catalyzing multistep reactions leading to C-C bond cleavage.

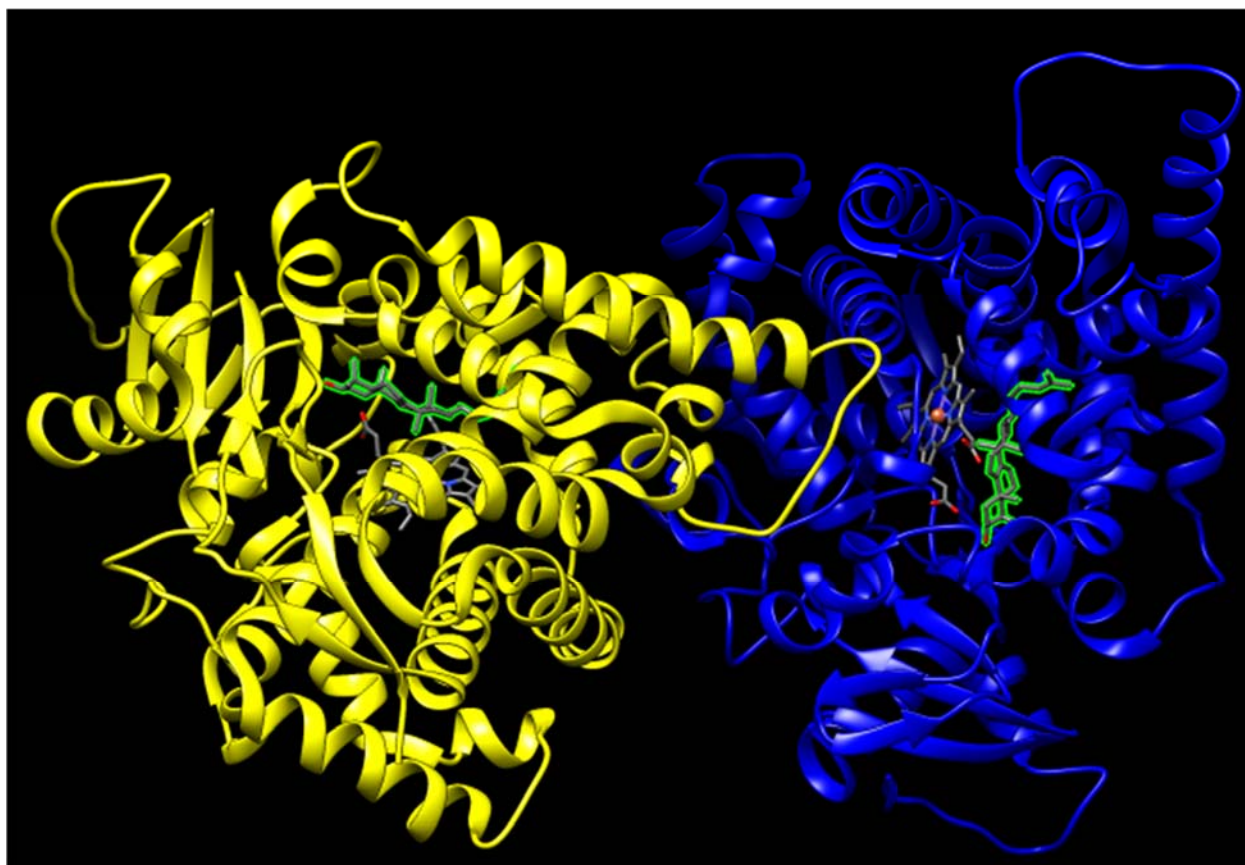

**Figure S2. The asymmetric unit of human CYP51 (D231A/H314A) (PDB code 6UEZ).** Two protein molecules (yellow and blue) are shown in a ribbon representation, two molecules of heme, and two molecules of lanosterol are shown in a stick representation. Lanosterol molecules are highlighted in green. RMSD of C $\alpha$  = 0.39 Å.

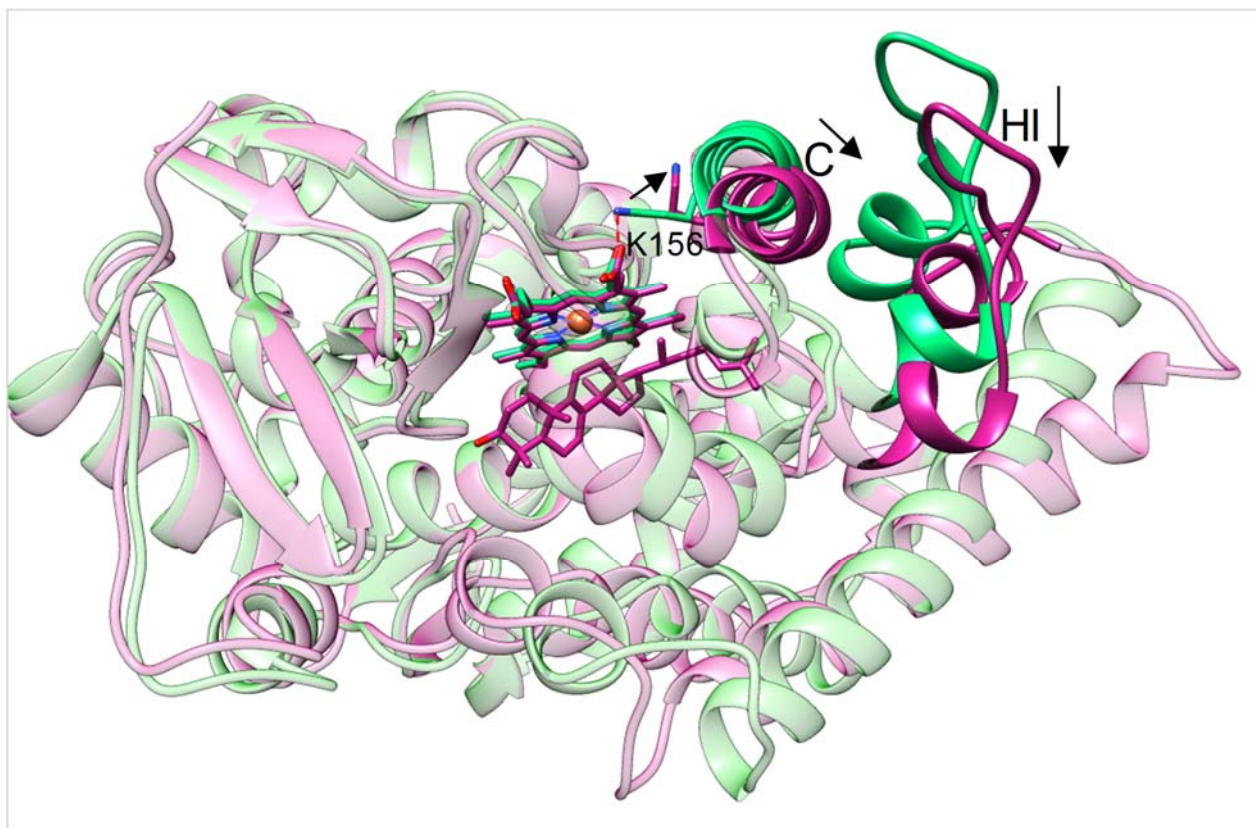

**Figure S3. Movement of the helix C and HI arm reshape the proximal surface of the CYP51 molecule.** Upper P450 face. Green: VFV-bound human CYP51 (PDB code: 4UHI), violet: lanosterol-bound D231A/H314A human CYP51. The arrows show the directions of changes upon binding of the substrate.

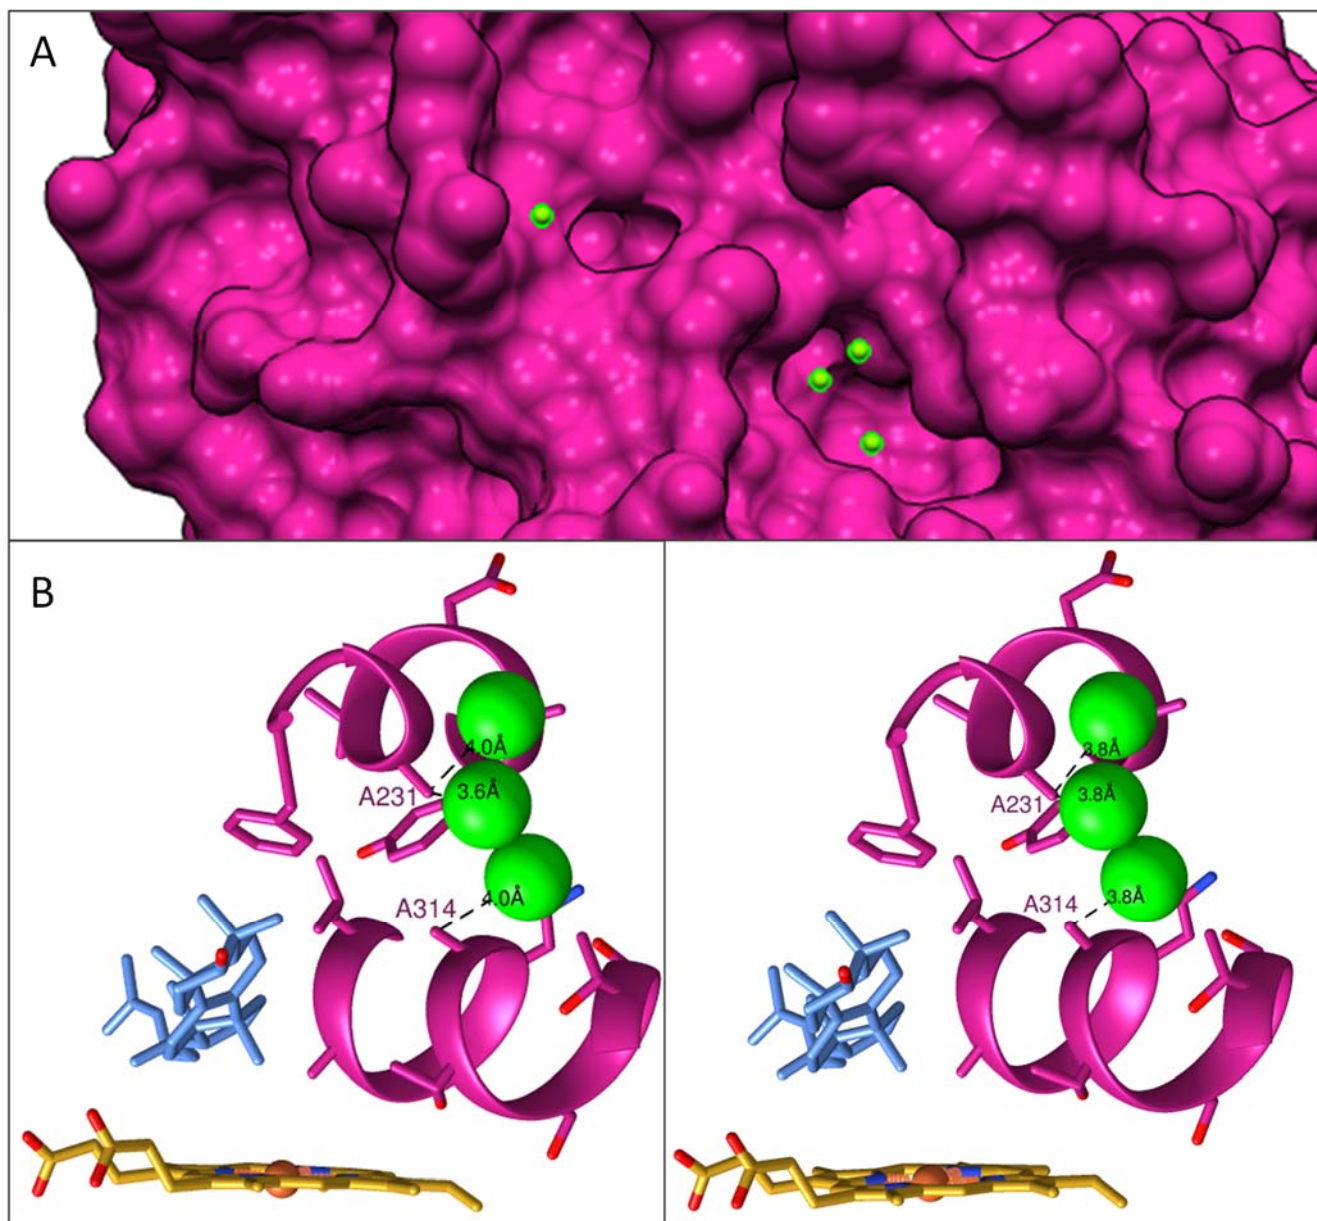

**Figure S4. Solvent molecules near the proton delivery area in the structure of D231A/H314A human CYP51.** *A*, enlarged fragment of the surface shown in Figure 6B, *B*, sick/ribbon representation of the involved segments in molecules A and B, left and right, respectively, the waters are depicted as green spheres, the distances to A231 and A314 are shown. The heme is yellow, lanosterol is blue.

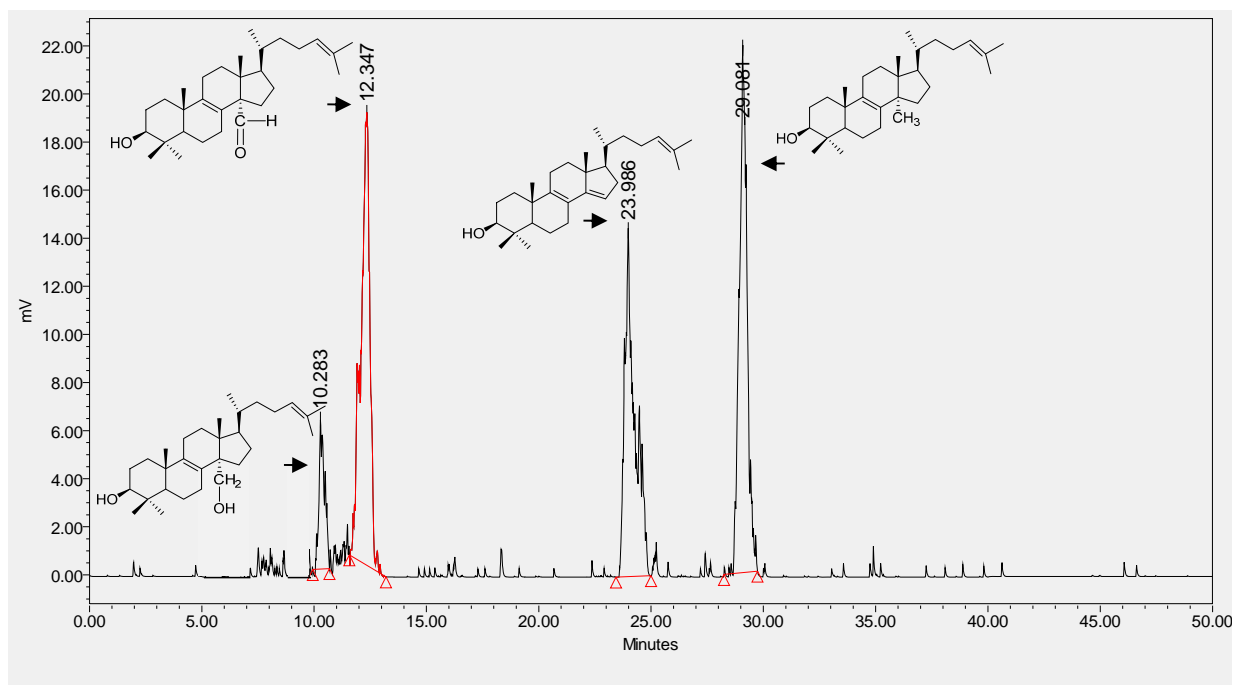

**Figure S5. HPLC profile of a sterol mixture containing lanosterol 14 $\alpha$ -carboxaldehyde.** The sterols were extracted from a reaction mixture containing 10  $\mu$ M *T. brucei* CYP51, 5  $\mu$ M CPR, 1 mM NADPH, and 50  $\mu$ M lanosterol after 2 hours of incubation at 37  $^{\circ}$ C. The aldehyde intermediate peak is indicated in red.

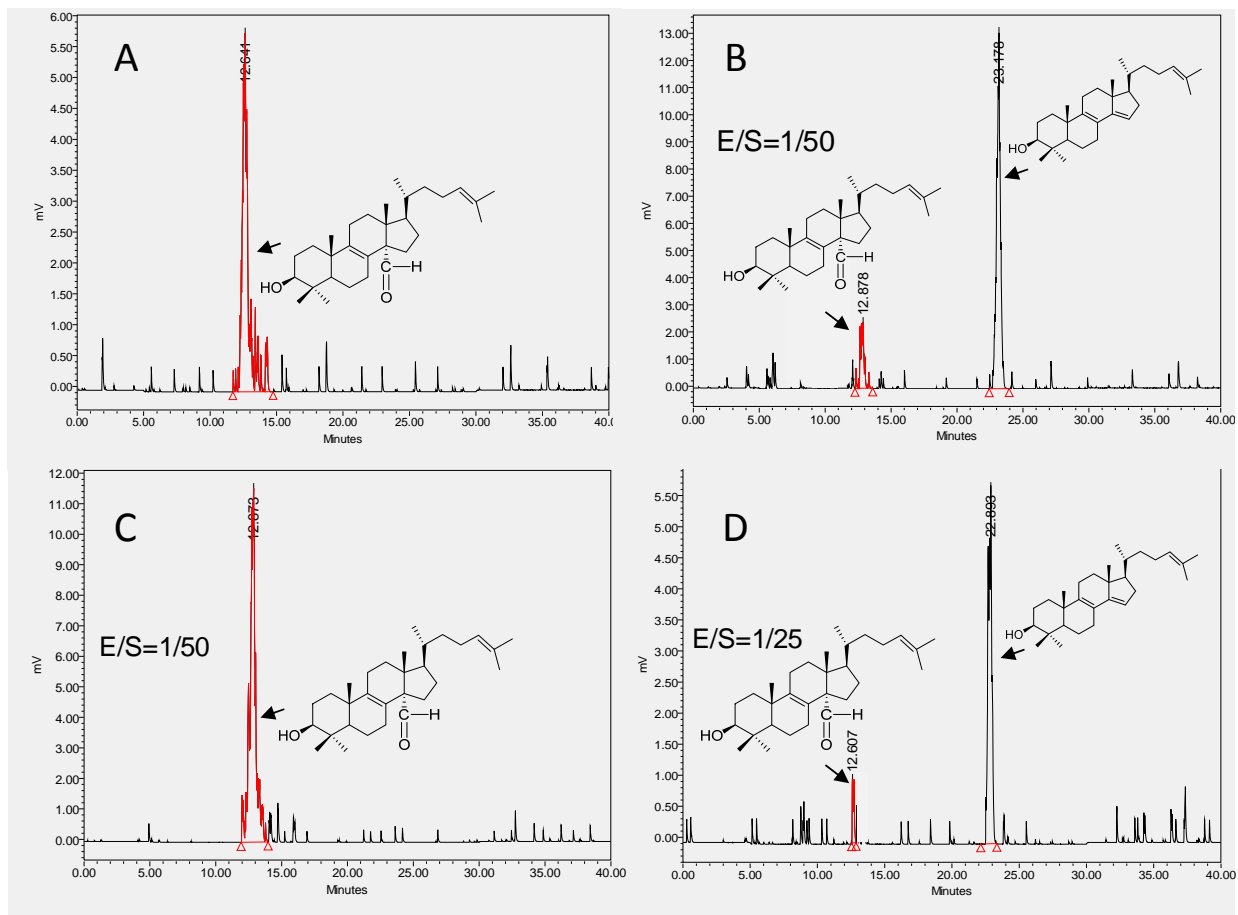

**Figure S6.** HPLC profiles of aldehyde deformylation by WT and D231/H314 human CYP51. *A*, purified lanosterol 14 $\alpha$ -carboxaldehyde intermediate; *B*, 1-min reaction with WT enzyme; *C*, 1-min reaction with the D231A/H314A mutant; *D*, 30-min reaction with the D231A/H314A mutant.

**Table S1. Substrate-contacting residues ( $\leq 4.5$  Å) in human (6UEZ) and *T. cruzi* CYP51 (6FMO) sequence identity 27%).**

| Secondary structural element | D231A/H314A human CYP51-lanosterol           | I105F <i>T. cruzi</i> CYP51 - obtusifoliol |
|------------------------------|----------------------------------------------|--------------------------------------------|
| B' helix                     | Y131*<br>L134<br>T135<br>F139                | Y103<br>F105<br>M106<br>F110               |
| B'' $\eta$ -turn (B'C loop)  | V143<br>A144<br>Y145                         | -<br>A115<br>Y116                          |
| C helix                      | F152<br>Q155<br>-<br>L159                    | -<br>Q126<br>L127<br>L130                  |
| F' helix                     | F234                                         | -                                          |
| I helix                      | G303<br>M304<br>G307<br>L308<br>L310<br>A311 | -<br>M284<br>A287<br>A288<br>F290<br>A291  |
| K helix/ $\beta$ 1-4 strand  | I377<br>I379<br>M381                         | L356<br>M358<br>M360                       |
| $\beta$ 4 hairpin            | M487<br>I488                                 | M487<br>M508                               |
| Total number of residues     | 22                                           | 19                                         |

\*Residues that align in the multiple sequence alignment are positioned on the same line.
